# Supplementary material for: Learning about the changing needs for prosthetics service provision from routinely collected digital centre management data: An exemplar study across three clinics in Cambodia
Source: PubMed Central journal article supplement (PMC9579830; doi:10.7189/jogh.12.04083), 2022-10-30
Supplement: jogh-12-04083-s001.pdf [file jogh-12-04083-s001.pdf]

## ONLINE SUPPLEMENTARY DOCUMENT

**Title:** Learning about the changing needs for prosthetics service provision from routinely collected digital centre management data: an exemplar study across three clinics in Cambodia

**Authors:** A Dickinson, L Gates, C Metcalf, C Owen, S Kheng, C Harte, B Sam, S Simpson, P Worsley, C Ostler, M Donovan-Hall & A Channon

*Table S1: Data behind Figure 1: percentage of reason for limb absence for each type of prosthetic device supplied, as a proxy for level of limb absence, for all clients (n=3451). Percentages are calculated in column categories.*

|                       | <b>Partial Foot</b> | <b>Transtib</b> | <b>Knee Disartic</b> | <b>Transfem</b> | <b>Transrad</b> | <b>Transhum</b> | <b>Other</b> | <b>Missing</b> | <b>Count</b> |
|-----------------------|---------------------|-----------------|----------------------|-----------------|-----------------|-----------------|--------------|----------------|--------------|
| Congenital            | 18.4                | 2.4             | 10.3                 | 1.3             | 4.4             | 6.7             | 12.3         | 0.0            | 203          |
| Road Traffic Accident | 6.2                 | 3.5             | 13.2                 | 10.5            | 2.3             | 7.6             | 4.9          | 0.0            | 358          |
| Weapon Injury         | 34.1                | 66.1            | 55.9                 | 49.7            | 51.9            | 30.5            | 38.5         | 0.0            | 4033         |
| Animal Bite           | 2.8                 | 0.6             | 0.0                  | 0.7             | 0.3             | 1.9             | 0.8          | 0.0            | 46           |
| Illness               | 8.4                 | 4.2             | 0.0                  | 4.9             | 1.5             | 4.8             | 5.7          | 0.0            | 293          |
| Accident at Work      | 6.2                 | 0.9             | 2.9                  | 2.4             | 7.9             | 17.1            | 10.7         | 0.0            | 149          |
| Other                 | 0.6                 | 1.3             | 4.4                  | 1.8             | 7.6             | 7.6             | 10.7         | 0.0            | 135          |
| Missing               | 23.5                | 21.0            | 13.2                 | 28.8            | 24.2            | 23.8            | 16.4         | 100.0          | 1900         |
| <i>Count</i>          | <i>179</i>          | <i>4,385</i>    | <i>68</i>            | <i>1,564</i>    | <i>343</i>      | <i>105</i>      | <i>122</i>   | <i>351</i>     | <i>7,117</i> |

|                      | <b>Congenital</b> | <b>Road Traffic Accident</b> | <b>Weapon Injury</b> | <b>Animal Bite</b> | <b>Illness</b> | <b>Accident at Work</b> | <b>Other</b> | <b>Missing</b> | <b>Count</b> |
|----------------------|-------------------|------------------------------|----------------------|--------------------|----------------|-------------------------|--------------|----------------|--------------|
| Partial Foot         | 16.3              | 3.1                          | 1.5                  | 10.9               | 5.1            | 7.4                     | 0.7          | 2.2            | 179          |
| Transtibial          | 52.2              | 42.5                         | 71.9                 | 56.5               | 63.1           | 27.5                    | 41.5         | 48.4           | 4385         |
| Knee Disarticulation | 3.5               | 2.5                          | 0.9                  | 0.0                | 0.0            | 1.3                     | 2.2          | 0.5            | 68           |
| Transfemoral         | 9.9               | 45.8                         | 19.3                 | 23.9               | 25.9           | 24.8                    | 20.7         | 23.7           | 1564         |
| Transradial          | 7.4               | 2.2                          | 4.4                  | 2.2                | 1.7            | 18.1                    | 19.3         | 4.4            | 343          |
| Transhumeral         | 3.5               | 2.2                          | 0.8                  | 4.4                | 1.7            | 12.1                    | 5.9          | 1.3            | 105          |
| Other                | 7.4               | 1.7                          | 1.2                  | 2.2                | 2.4            | 8.7                     | 9.6          | 1.1            | 122          |
| Missing              | 0.0               | 0.0                          | 0.0                  | 0.0                | 0.0            | 0.0                     | 0.0          | 18.5           | 351          |
| <i>Count</i>         | <i>203</i>        | <i>358</i>                   | <i>4,033</i>         | <i>46</i>          | <i>293</i>     | <i>149</i>              | <i>135</i>   | <i>1,900</i>   | <i>7,117</i> |

*Table S2: Data behind Figure 2: percentage of clients grouped by age at amputation or limb absence, for each reason for limb absence, for all clients (n=3541). Percentages are calculated in column categories.*

| Cause        | Congenital | Road<br>Traffic<br>Accident | Weapon       | Animal    | Illness    | Work<br>Accident | Other      | Missing      | Count        |
|--------------|------------|-----------------------------|--------------|-----------|------------|------------------|------------|--------------|--------------|
| 0-9          | 76.9       | 7.0                         | 1.9          | 21.7      | 3.1        | 14.1             | 6.7        | 2.3          | 349          |
| 10-19        | 3.9        | 17.9                        | 15.2         | 26.1      | 5.8        | 23.5             | 17.8       | 11.3         | 986          |
| 20-29        | 1.5        | 34.6                        | 53.0         | 23.9      | 11.3       | 28.2             | 26.7       | 38.7         | 3123         |
| 30-39        | 2.0        | 15.1                        | 22.0         | 13.0      | 11.3       | 18.1             | 8.2        | 15.4         | 1317         |
| 40-49        | 0.0        | 10.6                        | 5.6          | 4.4       | 20.8       | 7.4              | 12.6       | 5.2          | 451          |
| 50+          | 1.0        | 12.9                        | 1.9          | 10.9      | 45.4       | 6.7              | 12.6       | 6.2          | 406          |
| Missing      | 14.8       | 2.0                         | 0.5          | 0.0       | 2.4        | 2.0              | 15.6       | 21.0         | 485          |
| <i>Count</i> | <i>203</i> | <i>358</i>                  | <i>4,033</i> | <i>46</i> | <i>293</i> | <i>149</i>       | <i>135</i> | <i>1,900</i> | <i>7,117</i> |

*Table S3: Data behind Figure 3: percentage of types of prosthetic device supplied, as a proxy for level of limb absence, for the clients' year of amputation or absence grouped by decades, for all clients. Percentages are calculated in column categories.*

|                      | <b>Pre-<br/>1970</b> | <b>1970-<br/>1979</b> | <b>1980-<br/>1989</b> | <b>1990-<br/>1999</b> | <b>2000-<br/>2009</b> | <b>2010 –<br/>2019</b> | <b>Missing</b> | <b>Count</b> |
|----------------------|----------------------|-----------------------|-----------------------|-----------------------|-----------------------|------------------------|----------------|--------------|
| Partial Foot         | 12.5                 | 6.3                   | 1.7                   | 2.1                   | 3.7                   | 3.9                    | 3.6            | 179          |
| Transtibial          | 51.6                 | 52.6                  | 70.3                  | 66.3                  | 55.5                  | 46.7                   | 12.3           | 4385         |
| Knee Disarticulation | 4.7                  | 2.9                   | 0.7                   | 0.7                   | 1.3                   | 2.9                    | 0.2            | 68           |
| Transfemoral         | 12.5                 | 20.2                  | 21.2                  | 24.1                  | 27.0                  | 31.0                   | 4.6            | 1564         |
| Transradial          | 9.4                  | 9.6                   | 4.2                   | 4.2                   | 7.2                   | 7.3                    | 3.1            | 343          |
| Transhumeral         | 3.1                  | 3.3                   | 0.9                   | 1.3                   | 2.5                   | 4.1                    | 0.6            | 105          |
| Other                | 6.3                  | 5.2                   | 1.1                   | 1.3                   | 2.7                   | 4.1                    | 2.1            | 122          |
| Missing              | 0.0                  | 0.0                   | 0.0                   | 0.0                   | 0.0                   | 0.0                    | 73.4           | 351          |
| <i>Count</i>         | <i>64</i>            | <i>272</i>            | <i>2,904</i>          | <i>2,390</i>          | <i>596</i>            | <i>413</i>             | <i>478</i>     | <i>7,117</i> |

Table S4: Data behind Figure 4: percentage of reason for limb amputation or absence for the clients' year of amputation or absence grouped by decades, for all clients. Percentages are calculated in column categories.

|                              | Pre 1970 | 1970-1979 | 1980-1989 | 1990-1999 | 2000-2009 | 2010 – 2019 | Missing | Count |
|------------------------------|----------|-----------|-----------|-----------|-----------|-------------|---------|-------|
| <b>Congenital</b>            | 46.9     | 7.4       | 1.8       | 1.7       | 4.0       | 2.2         | 5.4     | 203   |
| <b>Road Traffic Accident</b> | 4.7      | 1.5       | 0.8       | 3.3       | 21.8      | 27.6        | 1.1     | 358   |
| <b>Weapon Injury</b>         | 26.6     | 61.7      | 72.1      | 67.2      | 17.0      | 7.5         | 3.8     | 4033  |
| <b>Animal Bite</b>           | 3.1      | 0.7       | 0.07      | 0.3       | 4.4       | 1.5         | 0.0     | 46    |
| <b>Illness</b>               | 1.6      | 3.3       | 0.5       | 2.4       | 20.3      | 20.3        | 1.5     | 293   |
| <b>Accident at Work</b>      | 1.6      | 1.5       | 0.6       | 2.0       | 7.9       | 7.5         | 0.6     | 149   |
| <b>Other</b>                 | 3.1      | 1.1       | 0.2       | 1.0       | 6.4       | 9.9         | 4.4     | 135   |
| <b>Missing</b>               | 12.5     | 22.8      | 24        | 22.1      | 18.3      | 23.5        | 83.3    | 1900  |
| <b>Count</b>                 | 64       | 272       | 2,904     | 2,390     | 596       | 413         | 478     | 7,117 |

Table S5: Data behind Figure 5: percentage of the type of prosthetic device supplied, as a proxy for level of limb absence, for the clients' current age grouped by decades, for clients who were active at the end of 2019 and at the end of 2005. Percentages are calculated in column categories.

| <b>End of 2019:</b>  | 0-9  | 10-19 | 20-29 | 30-39 | 40-49 | 50+   | Missing | Overall | Count |
|----------------------|------|-------|-------|-------|-------|-------|---------|---------|-------|
| Partial Foot         | 17.7 | 7.1   | 6.9   | 2.8   | 0.4   | 2.0   | 0.0     | 2.2     | 62    |
| Transtibial          | 35.3 | 40.0  | 34.7  | 51.8  | 70.4  | 75.7  | 0.0     | 63.5    | 1,791 |
| Knee Disarticulation | 5.9  | 2.9   | 3.5   | 3.2   | 1.2   | 0.9   | 0.0     | 1.3     | 36    |
| Transfemoral         | 5.9  | 22.9  | 33.0  | 31.6  | 22.9  | 17.5  | 0.0     | 19.4    | 547   |
| Transradial          | 17.7 | 8.6   | 11.6  | 5.3   | 3.1   | 2.1   | 0.0     | 3.2     | 89    |
| Transhumeral         | 11.8 | 4.3   | 5.8   | 2.4   | 1.2   | 0.6   | 0.0     | 1.3     | 36    |
| Other                | 5.9  | 14.3  | 4.6   | 2.8   | 0.8   | 1.2   | 0.0     | 1.7     | 49    |
| Missing              | 0.0  | 0.0   | 0.0   | 0.0   | 0.0   | 0.0   | 100.0   | 7.5     | 210   |
| <b>Count</b>         | 17   | 70    | 173   | 247   | 489   | 1,615 | 209     | ..      | 2,820 |

| <b>End of 2005:</b>  | 0-9  | 10-19 | 20-29 | 30-39 | 40-49 | 50+  | Missing | Overall | Count |
|----------------------|------|-------|-------|-------|-------|------|---------|---------|-------|
| Partial Foot         | 17.2 | 8.1   | 1.6   | 1.4   | 2.2   | 2.4  | 0.0     | 2.1     | 108   |
| Transtibial          | 58.6 | 48.3  | 60.6  | 69.3  | 72.2  | 71.7 | 0.0     | 68.6    | 3,546 |
| Knee Disarticulation | 0.0  | 2.0   | 1.0   | 0.8   | 0.8   | 0.9  | 0.0     | 0.9     | 46    |
| Transfemoral         | 10.3 | 18.1  | 28.6  | 24.2  | 19.6  | 19.1 | 0.0     | 22.4    | 1,157 |
| Transradial          | 6.9  | 11.4  | 5.3   | 3.0   | 3.1   | 3.3  | 0.0     | 3.6     | 188   |
| Transhumeral         | 6.9  | 6.7   | 1.3   | 0.7   | 0.6   | 0.9  | 0.0     | 1.0     | 52    |
| Other                | 0.0  | 5.4   | 1.5   | 0.5   | 1.4   | 1.5  | 0.0     | 1.2     | 60    |
| Missing              | 0.0  | 0.0   | 0.0   | 0.0   | 0.1   | 0.2  | 100.0   | 0.3     | 13    |
| <b>Count</b>         | 29   | 149   | 678   | 2,015 | 1,623 | 665  | 11      | ..      | 5,170 |
